# Supplementary material for: Epstein–Barr Virus Promotes Oral Squamous Cell Carcinoma Stemness through the Warburg Effect
Source: MDPI journal article supplement (doi:10.3390/ijms241814072), 2023-09-14
Supplement: s1 [file s1]

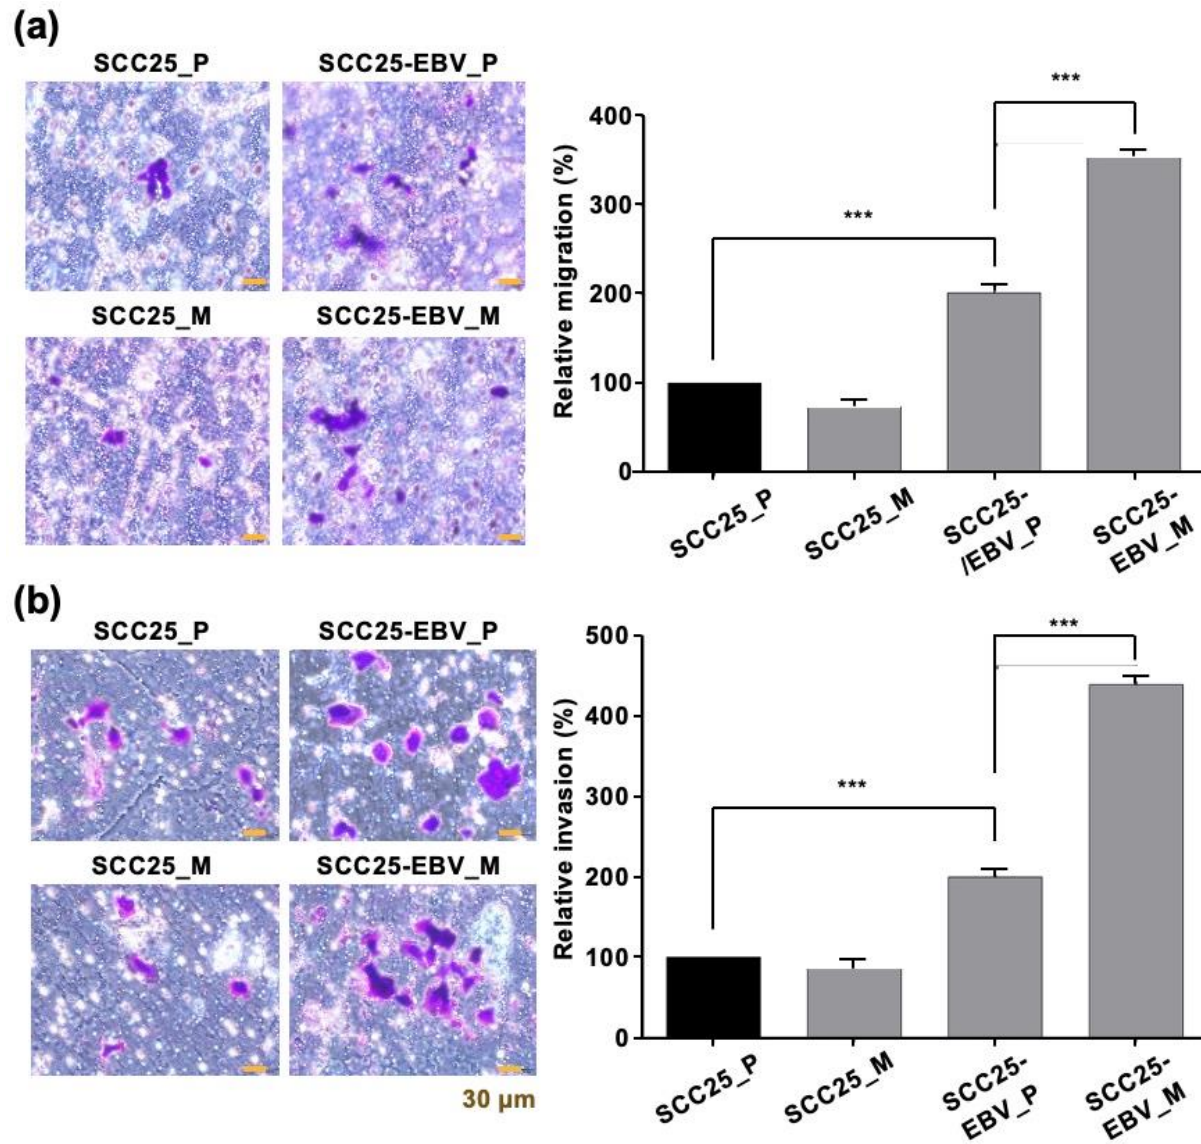

**Figure S1.** EBV promotes malignant phenotype of SCC25 cells after passage by xenograft model. Tumor cells were isolated from tumor tissues and examined for cell migration (a) and invasion (b) by transwell assay. P: parental cells and M: cells isolated from tumor tissues after passage by mice xenograft model. \*\*\*:  $p < 0.001$ .

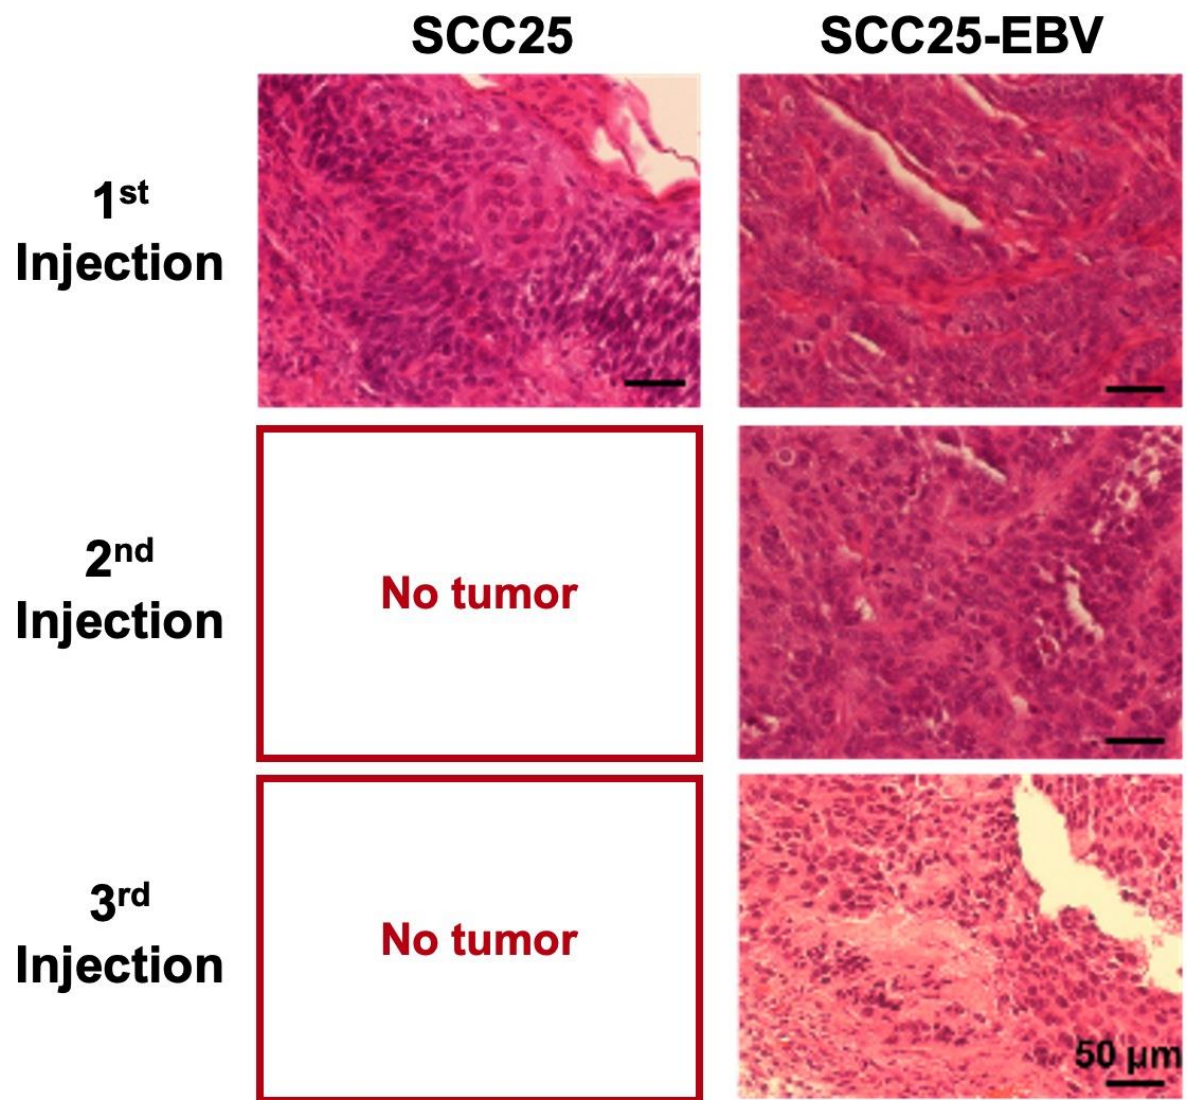

**Figure S2.** The histology of tumor tissues serially transferred by Balb/c mice as shown in Figure 7(a). Tumor tissues of SCC25 or SCC25-EBV were examined by H&E staining. Magification; 20X.

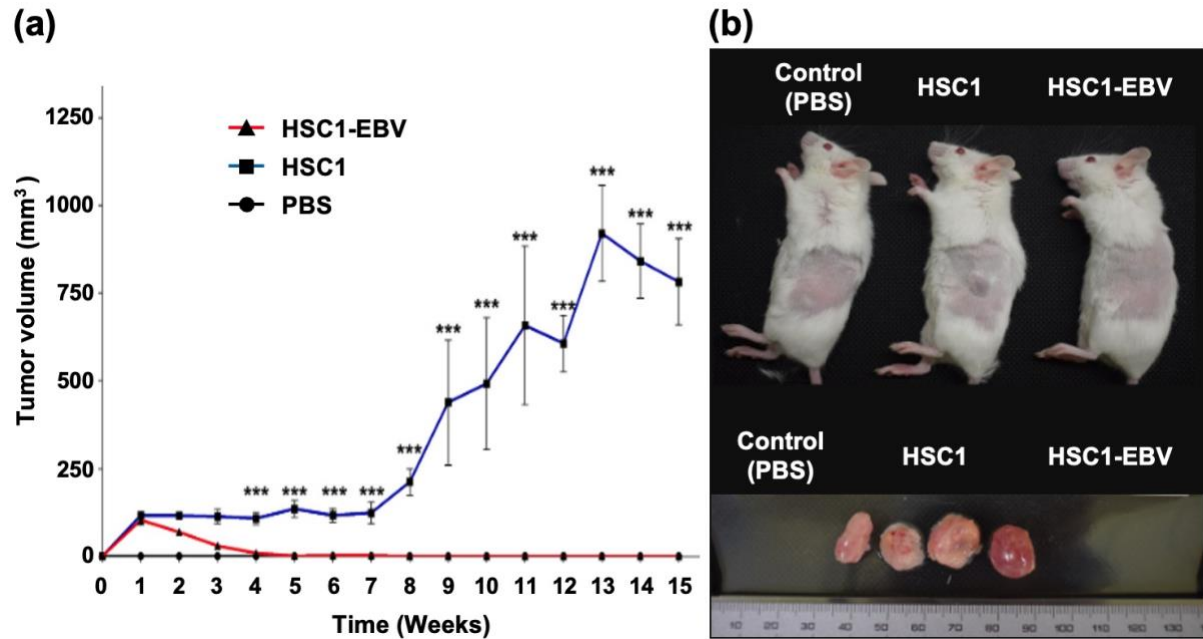

**Figure S3.** EBV infection did not promote tumor in HSC1 cells by the xenograft model. (a): HSC1 or HSC1-EBV cells were suspended with phosphate-buffered saline (PBS) and were subcutaneously injected into SCID mice. Four mice were injected with cells or PBS. Tumor volumes were measured weekly by caliper. (b): Upper panel shows tumors grown at the flank of mice. Lower panel shows each tumor excised from mice. \*:  $p < 0.05$ .

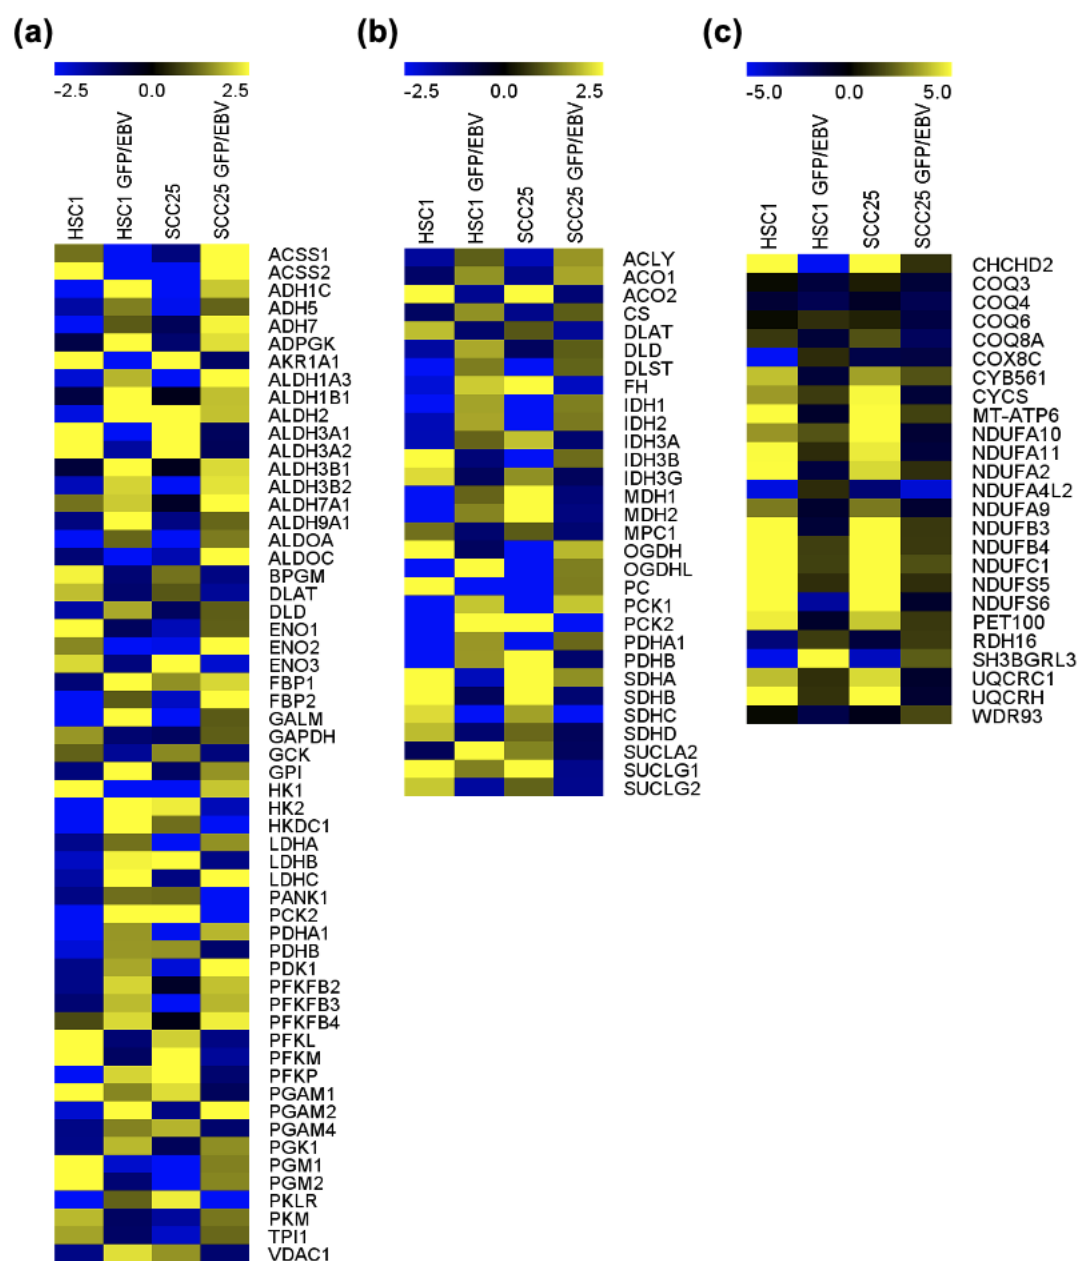

**Figure S4.** The expression levels of genes that were associated with glycolysis (a), TCA cycle (b) and electron transport chain (c) in EBV-positive and EBV-negative cell line quantified by microarray technique.

**Table S1.** Significantly up-regulated apoptosis-associated genes in HSC1-EBV cells.

| Entrez gene ID | Gene name                                                   | Log2(FC) |
|----------------|-------------------------------------------------------------|----------|
| 9274           | BAF chromatin remodeling complex subunit BCL7C (BCL7C)      | 4.31     |
| 581            | BCL2 associated X, apoptosis regulator (BAX)                | 3.92     |
| 27113          | BCL2 binding component 3 (BBC3)                             | 4.07     |
| 666            | BCL2 family apoptosis regulator BOK (BOK)                   | 3.01     |
| 598            | BCL2 like 1 (BCL2L1)                                        | 3.20     |
| 83596          | BCL2 like 12 (BCL2L12)                                      | 2.10     |
| 440603         | BCL2 like 15 (BCL2L15)                                      | 3.03     |
| 8837           | CASP8 and FADD like apoptosis regulator (CFLAR)             | 3.33     |
| 1048           | CEA cell adhesion molecule 5 (CEACAM5)                      | 4.95     |
| 4680           | CEA cell adhesion molecule 6 (CEACAM6)                      | 5.60     |
| 10395          | DLC1 Rho GTPase activating protein (DLC1)                   | 2.60     |
| 220042         | DNA damage induced apoptosis suppressor (DDIAS)             | 2.41     |
| 55332          | DNA damage regulated autophagy modulator 1 (DRAM1)          | 2.23     |
| 54097          | FAM3 metabolism regulating signaling molecule B (FAM3B)     | 2.02     |
| 23017          | Fas apoptotic inhibitory molecule 2 (FAIM2)                 | 2.02     |
| 355            | Fas cell surface death receptor (FAS)                       | 3.02     |
| 51454          | GULP PTB domain containing engulfment adaptor 1 (GULP1)     | 7.59     |
| 3725           | Jun proto-oncogene, AP-1 transcription factor subunit (JUN) | 3.88     |
| 8462           | KLF transcription factor 11 (KLF11)                         | 3.24     |
| 4170           | MCL1 apoptosis regulator, BCL2 family member (MCL1)         | 2.84     |
| 4193           | MDM2 proto-oncogene (MDM2)                                  | 3.25     |
| 10783          | NIMA related kinase 6 (NEK6)                                | 2.89     |
| 91662          | NLR family pyrin domain containing 12 (NLRP12)              | 3.77     |
| 4832           | NME/NM23 nucleoside diphosphate kinase 3 (NME3)             | 3.54     |
| 10201          | NME/NM23 nucleoside diphosphate kinase 6 (NME6)             | 2.11     |
| 5292           | Pim-1 proto-oncogene, serine/threonine kinase (PIM1)        | 2.62     |
| 11040          | Pim-2 proto-oncogene, serine/threonine kinase (PIM2)        | 3.48     |
| 415116         | Pim-3 proto-oncogene, serine/threonine kinase (PIM3)        | 3.11     |
| 5899           | RAS like proto-oncogene B (RALB)                            | 3.72     |
| 6461           | SH2 domain containing adaptor protein B (SHB)               | 2.92     |
| 30011          | SH3 domain containing kinase binding protein 1 (SH3KBP1)    | 4.36     |
| 6881           | TATA-box binding protein associated factor 10 (TAF10)       | 2.10     |
| 29844          | TCF3 fusion partner (TFPT)                                  | 2.20     |
| 25816          | TNF alpha induced protein 8 (TNFAIP8)                       | 3.09     |
| 7188           | TNF receptor associated factor 5 (TRAF5)                    | 2.04     |
| 8797           | TNF receptor superfamily member 10a (TNFRSF10A)             | 2.15     |
| 8795           | TNF receptor superfamily member 10b (TNFRSF10B)             | 2.66     |
| 8793           | TNF receptor superfamily member 10d (TNFRSF10D)             | 2.83     |
| 51330          | TNF receptor superfamily member 12A (TNFRSF12A)             | 2.28     |
| 55504          | TNF receptor superfamily member 19 (TNFRSF19)               | 3.13     |

|          |                                                            |       |
|----------|------------------------------------------------------------|-------|
| 3604     | TNF receptor superfamily member 9 (TNFRSF9)                | 3.04  |
| 9966     | TNF superfamily member 15 (TNFSF15)                        | 7.55  |
| 51499    | TP53 regulated inhibitor of apoptosis 1 (TRIAP1)           | 2.11  |
| 677      | ZFP36 ring finger protein like 1 (ZFP36L1)                 | 3.10  |
| 317      | apoptotic peptidase activating factor 1 (APAF1)            | 2.87  |
| 8312     | axin 1 (AXIN1)                                             | 3.27  |
| 79444    | baculoviral IAP repeat containing 7 (BIRC7)                | 2.88  |
| 23705    | cell adhesion molecule 1 (CADM1)                           | 7.51  |
| 1116     | chitinase 3 like 1 (CHI3L1)                                | 6.56  |
| 64651    | cysteine and serine rich nuclear protein 1 (CSRNP1)        | 3.41  |
| 26999    | cytoplasmic FMR1 interacting protein 2 (CYFIP2)            | 2.72  |
| 1800     | dipeptidase 1 (DPEP1)                                      | 2.26  |
| 1.00E+08 | double homeobox 4 (DUX4)                                   | 3.16  |
| 10913    | ectodysplasin A receptor (EDAR)                            | 5.34  |
| 79767    | engulfment and cell motility 3 (ELMO3)                     | 3.54  |
| 2012     | epithelial membrane protein 1 (EMP1)                       | 2.31  |
| 2014     | epithelial membrane protein 3 (EMP3)                       | 3.37  |
| 3956     | galectin 1 (LGALS1)                                        | 3.81  |
| 284110   | gasdermin A (GSDMA)                                        | 4.44  |
| 51022    | glutaredoxin 2 (GLRX2)                                     | 2.93  |
| 3002     | granzyme B (GZMB)                                          | 10.25 |
| 2999     | granzyme H (GZMH)                                          | 2.78  |
| 1647     | growth arrest and DNA damage inducible alpha (GADD45A)     | 2.39  |
| 4616     | growth arrest and DNA damage inducible beta (GADD45B)      | 2.91  |
| 9026     | huntingtin interacting protein 1 related (HIP1R)           | 2.29  |
| 3635     | inositol polyphosphate-5-phosphatase D (INPP5D)            | 4.93  |
| 3689     | integrin subunit beta 2 (ITGB2)                            | 3.10  |
| 3429     | interferon alpha inducible protein 27 (IFI27)              | 2.61  |
| 2537     | interferon alpha inducible protein 6 (IFI6)                | 2.93  |
| 11009    | interleukin 24 (IL24)                                      | 5.00  |
| 79960    | jade family PHD finger 1 (JADE1)                           | 3.83  |
| 23095    | kinesin family member 1B (KIF1B)                           | 3.41  |
| 4853     | notch receptor 2 (NOTCH2)                                  | 2.82  |
| 3164     | nuclear receptor subfamily 4 group A member 1 (NR4A1)      | 4.45  |
| 5058     | p21 (RAC1) activated kinase 1 (PAK1)                       | 2.94  |
| 55367    | p53-induced death domain protein 1 (PIDD1)                 | 2.83  |
| 5551     | perforin 1 (PRF1)                                          | 5.34  |
| 5366     | phorbol-12-myristate-13-acetate-induced protein 1 (PMAIP1) | 2.94  |
| 7262     | pleckstrin homology like domain family A member 2 (PHLDA2) | 2.33  |
| 1263     | polo like kinase 3 (PLK3)                                  | 2.92  |
| 5047     | progesterone associated endometrial protein (PAEP)         | 7.01  |
| 84306    | programmed cell death 2 like (PDCD2L)                      | 2.97  |

|        |                                                                                |      |
|--------|--------------------------------------------------------------------------------|------|
| 10015  | programmed cell death 6 interacting protein (PDCD6IP)                          | 3.55 |
| 8682   | proliferation and apoptosis adaptor protein 15 (PEA15)                         | 2.27 |
| 23645  | protein phosphatase 1 regulatory subunit 15A (PPP1R15A)                        | 3.64 |
| 5794   | protein tyrosine phosphatase receptor type H (PTPRH)                           | 3.69 |
| 388    | ras homolog family member B (RHOB)                                             | 3.08 |
| 84236  | rhomboid domain containing 1 (RHBDD1)                                          | 2.97 |
| 55312  | riboflavin kinase (RFK)                                                        | 3.33 |
| 6197   | ribosomal protein S6 kinase A3 (RPS6KA3)                                       | 3.38 |
| 117584 | ring finger and FYVE like domain containing E3 ubiquitin protein ligase (RFFL) | 3.41 |
| 54476  | ring finger protein 216 (RNF216)                                               | 3.08 |
| 9262   | serine/threonine kinase 17b (STK17B)                                           | 2.53 |
| 30061  | solute carrier family 40 member 1 (SLC40A1)                                    | 2.93 |
| 10011  | steroid receptor RNA activator 1 (SRA1)                                        | 2.48 |
| 84951  | tensin 4 (TNS4)                                                                | 3.87 |
| 7048   | transforming growth factor beta receptor 2 (TGFB2)                             | 3.94 |
| 84260  | trichoplein keratin filament binding (TCHP)                                    | 3.93 |
| 8565   | tyrosyl-tRNA synthetase 1 (YARS1)                                              | 2.86 |
| 7429   | villin 1 (VIL1)                                                                | 9.40 |
| 64393  | zinc finger matrin-type 3 (ZMAT3)                                              | 2.86 |
